# Supplementary material for: Adsorption and HPLC of carbohydrates and related hydroxy compounds on zeolites
Source: Royal Society of Chemistry journal article supplement (doi:10.1039/c7ay02634j), 2018-01-01
Supplement: c7ay02634j1.pdf [file c7ay02634j1.pdf]

## Supplementary information for

# Adsorption and HPLC of carbohydrates and related hydroxy compounds on zeolites

Wolfgang Wach, Iris Fornefett, Christoph Buttersack, Klaus Buchholz

### Conversion of excess adsorption constants $K_{ex}$ to absolute adsorption values $K$

The excess adsorption  $q_{ex}$  (in g solute per g zeolite) is defined by the concentration difference of the initial solute concentration  $c_o$  and its concentration in the equilibrium state  $c$  related to the mass of zeolite  $m_z$  per volume  $V_o$  and it is thus a simple expression of the mass balance

$$(1) \quad c_z = m_z / V_o$$

$$(2) \quad q_{ex} = \frac{c_o - c}{c_z}$$

Small adsorption values should obey Henry's law with  $K_{ex}$  being the excess adsorption constant

$$(3) \quad K_{ex} = q_{ex} / c$$

Combination with the mass balance (eqn. (2)) yields

$$(4) \quad K_{ex} = \frac{c_o - c}{c c_z}$$

When the volume of the micropore is known, e.g. by measurement of the  $N_2$ -adsorption at 77K, this volume may be assumed to be filled with molecules of the solvent plus those of the adsorbed solute. The absolute adsorption  $q$  is given by the following equation ( )

$$(5) \quad q = \frac{c_o - (1 - \omega_o) m_z / m_o) c}{m_z (1/V_o + c/m_o)}$$

where  $\omega_o$  is the amount of solvent (plus solute) in the micropore and  $m_o$  is the total mass of the solvent liquid.  $\omega_o$  may be obtained by measuring the micropore volume by  $N_2$  adsorption at 77K and assuming a density equal to the bulk phase. By defining the absolute Henry constant via

$$(6) \quad K = q / c$$

and by using the solvent density  $\rho$  according to

$$(7) \quad m_o = \rho V_o$$

one obtains

$$(8) \quad K = \frac{c_o - (1 - \omega_o c_z / \rho) c}{c c_z (1 + c / \rho)}$$

and after rearrangement

$$(9) \quad K = \frac{c_o - c}{c c_z (1 + c / \rho)} + \frac{\omega_o}{(\rho + c)}$$

For the limit of small equilibrium concentrations that equation reduces to

$$(10) \quad \lim_{c \rightarrow 0} K = \frac{c_o - c}{c c_z} + \omega_o / \rho$$

### Adsorption of a monobasic organic acid

The concentration of the monobasic acid in aqueous solution is given by the sum of its dissociated  $c_{A^-}$  and its non-dissociated part  $c_{AH}$

$$(11) \quad c_{AH,o} = c_{AH} + c_{A^-}$$

The law of mass action

$$(12) \quad (c_{A^-} c_{H^+}) / c_{AH} = K_a$$

is modified by the condition of electro neutrality in a medium with the proton concentration  $c_{H^+}$  via

$$(13) \quad c_{A^-} = c_{H^+}$$

to

$$(14) \quad c_{AH} = c_{H^+}^2 / K_a$$

Due to the adsorption of the non-dissociated acid the initial concentration  $c_{AH,tot}$  is reduced to  $c_{AH}$  according to

$$(15) \quad c_{AH,tot} - c_{AH,o} = K_{ex} c_z c_{AH}$$

where  $K_{ex}$  is the excess adsorption equilibrium constant for the non-dissociated acid and  $c_z$  is the zeolite concentration, and with eqn. (14) one obtains

$$(16) \quad c_{AH,tot} - c_{AH,o} = K_{ex} c_z c_{H^+}^2 / K_a$$

Formally the adsorption can also be described as the adsorption of the non-dissociated plus dissociated form by the constant  $K_{ex}'$  via

$$(17) \quad c_{AH,tot} - c_{AH,o} = K_{ex}' c_z c_{AH,o}$$

and one obtains

$$(18) \quad K_{ex}' c_{AH,o} = K_{ex} c_{H^+}^2 / K_a$$

At last the substitution of  $c_{AH,o}$  by the eqns. (11), (13), and (14) results in

$$(19) \quad K_{ex}' = K_{ex} c_{H^+} / (c_{H^+} + K_a)$$

## Adsorption of a tribasic organic acid

The tribasic acid is composed of

$$(20) \quad c_{AH3,o} = c_{AH3} + c_{AH2^-} + c_{AH^-} + c_{A^{3-}} .$$

As only the behavior at lower pH is of interest, the concentration of  $c_{A^{3-}}$  is neglected here.

Instead of eqn. (12) the law of mass action is now represented by

$$(21) \quad (c_{AH2^-} c_{H^+}) / c_{AH3} = K_{a1}$$

and

$$(22) \quad (c_{AH^-} c_{H^+}) / c_{AH2^-} = K_{a2}$$

Instead of eqn. (13) the state of electro neutrality is defined by

$$(23) \quad c_{AH2^-} + (1/2) c_{AH^-} = c_{H^+}$$

If the concentration of  $c_{AH^-}$  is expressed by using the mass law action (21), eqn. (22) can be transformed to

$$(24) \quad c_{AH2^-} = c_{H^+}^2 / (c_{H^+} + (1/2) K_{a2})$$

and by using eqn. (20) one obtains for the concentration of the non-dissociated acid

$$(25) \quad c_{AH3} = c_{H^+}^3 / \{ (c_{H^+} + (1/2) K_{a2}) K_{a1} \}$$

Again, it has to be implemented that the initial concentration  $c_{AH3,tot}$  is reduced to  $c_{AH3,o}$  by the adsorption of the non-dissociated acid on the zeolite according to

$$(26) \quad c_{AH,tot} - c_{AH3,o} = K_{ex} c_z c_{AH3}$$

and by consideration of eqn. (25) one obtains

$$(27) \quad c_{AH,tot} - c_{AH3,o} = K_{ex} c_z c_{H^+}^3 / \{ (c_{H^+} + (1/2) K_{a2}) K_{a1} \}$$

Alternatively the adsorption can also be described as the adsorption of the non-dissociated plus dissociated form by the constant  $K_{ex}'$  via

$$(28) \quad c_{AH,tot} - c_{AH3,o} = K_{ex}' c_z c_{AH3,o}$$

and one obtains

$$(29) \quad K_{ex}' c_{AH3,o} = K_{ex} c_{H^+}^3 / \{ (c_{H^+} + (1/2) K_{a2}) K_{a1} \}$$

$c_{AH3,o}$  can be expressed as a function of  $c_{H^+}$  by using the eqns. (21), (22), and (20) by canceling the  $c_{A^{3-}}$  term:

$$(30) \quad c_{AH3,o} = c_{H^+} (c_{H^+}^2 + c_{H^+} K_{a1} + K_{a1} K_{a2}) / \{ (c_{H^+} + (1/2) K_{a2}) K_{a1} \}$$

At last the insertion of eqn. (30) into (29) yields

$$(31) \quad K_{ex}' = K_{ex} c_{H^+}^2 / (c_{H^+}^2 + c_{H^+} K_{a1} + K_{a1} K_{a2})$$

## Additional Tables and Figures

Table A1: Numerical data of Figure 7.

Retention times for a column filled with SC1011 and NH2P-50 4E both from Shodex company were taken from their website. In case of SC1011, which is a Ca<sup>++</sup> exchanged sulfonic acid resin of 6 µm diameter, the temperature is 80°C, the eluent is water with 1 mL min<sup>-1</sup>, and the column has a diameter of 8 mm and a length of 300 mm ; in case of NH2P-50 4E, which is functionalized with amino groups on porous silica of 5 µm diameter, the temperature is 30°C, the eluent is acetonitrile / water (75/25) with 1 ml min<sup>-1</sup>, and the column has a diameter of 4.6 mm and a length of 250 mm. Data for the void volume (pullulan, D<sub>2</sub>O) were disclosed by the company.

|                    | retention        |                 | capacity factors |                 |             | selectivity      |                 |             |
|--------------------|------------------|-----------------|------------------|-----------------|-------------|------------------|-----------------|-------------|
|                    | Ca <sup>++</sup> | NH <sub>2</sub> | Ca <sup>++</sup> | NH <sub>2</sub> | DAY         | Ca <sup>++</sup> | NH <sub>2</sub> | DAY         |
| <b>void marker</b> | <b>5.30</b>      | <b>2.53</b>     |                  |                 |             |                  |                 |             |
| <b>glucose</b>     | <b>7.30</b>      | <b>6.75</b>     | <b>0.38</b>      | <b>1.67</b>     | <b>1.73</b> | <b>1.00</b>      | <b>1.00</b>     | <b>1.00</b> |
| galactose          | 7.98             | 8.10            | 0.51             | 2.20            | 2.04        | 1.34             | 1.32            | 1.18        |
| sorbose            | 8.03             | 7.35            | 0.52             | 1.91            | 2.71        | 1.37             | 1.14            | 1.57        |
| mannose            | 8.17             | 7.84            | 0.54             | 2.10            | 2.88        | 1.44             | 1.26            | 1.66        |
| fructose           | 8.85             | 6.79            | 0.67             | 1.68            | 3.40        | 1.78             | 1.01            | 1.97        |
| gentiobiose        | 6.08             | 16.36           | 0.15             | 5.47            | 0.97        | 0.75             | 1.18            | 0.83        |
| <b>maltose</b>     | <b>6.34</b>      | <b>14.24</b>    | <b>0.20</b>      | <b>4.63</b>     | <b>1.17</b> | <b>1.00</b>      | <b>1.00</b>     | <b>1.00</b> |
| lactose            | 6.51             | 13.27           | 0.23             | 4.25            | 1.61        | 1.16             | 0.92            | 1.38        |
| trehalose          | 6.27             | 13.25           | 0.18             | 4.24            | 1.69        | 0.93             | 0.92            | 1.44        |
| melibiose          | 6.45             | 14.70           | 0.22             | 4.81            | 2.69        | 1.11             | 1.04            | 2.30        |
| lactulose          | 6.99             | 10.72           | 0.32             | 3.24            | 3.15        | 1.63             | 0.70            | 2.69        |
| isomaltose         | 6.26             | 15.18           | 0.18             | 5.00            | 5.14        | 0.92             | 1.08            | 4.39        |
| trehalulose        | 6.95             | 11.68           | 0.31             | 3.62            | 13.80       | 1.59             | 0.78            | 11.79       |
| isomaltulose       | 6.45             | 12.14           | 0.22             | 3.80            | 16.25       | 1.11             | 0.82            | 13.89       |
| sucrose            | 6.29             | 11.87           | 0.19             | 3.69            | 32.05       | 0.95             | 0.80            | 27.39       |
| melezitose         | 5.79             | 19.27           | 0.09             | 6.62            | 0.02        | 0.83             | 0.75            | 0.05        |
| <b>maltotriose</b> | <b>5.89</b>      | <b>24.96</b>    | <b>0.11</b>      | <b>8.87</b>     | <b>0.44</b> | <b>1.00</b>      | <b>1.00</b>     | <b>1.00</b> |
| panose             | 5.78             | 25.60           | 0.09             | 9.12            | 2.61        | 0.81             | 1.03            | 5.92        |
| raffinose          | 5.78             | 20.25           | 0.09             | 7.00            | 17.90       | 0.81             | 0.79            | 40.68       |
| isomaltotriose     | 5.80             | 27.60           | 0.09             | 9.91            | 51.00       | 0.85             | 1.12            | 115.91      |
| stachyose          | 5.60             | 36.20           |                  |                 |             |                  |                 |             |
| nystose            | 5.50             | 31.90           |                  |                 |             |                  |                 |             |

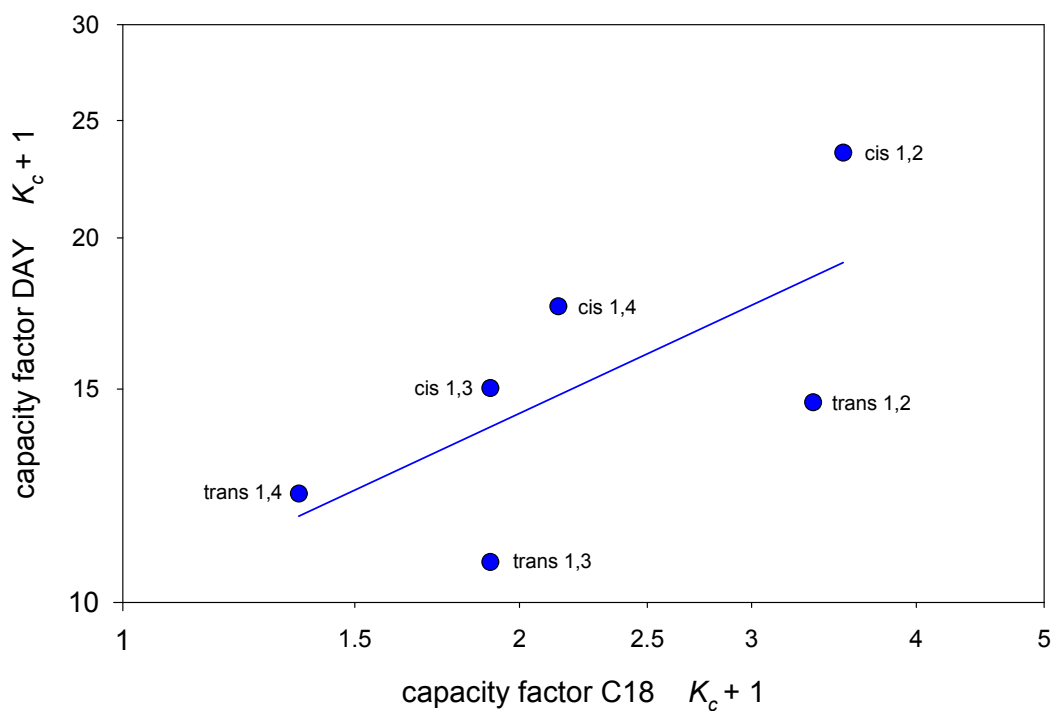

Figure A1: Correlation of the HPLC on the DAY zeolite at 25°C and the hydrophobicity at the C18 surface for isomeric cyclohexanediols at 60°C.

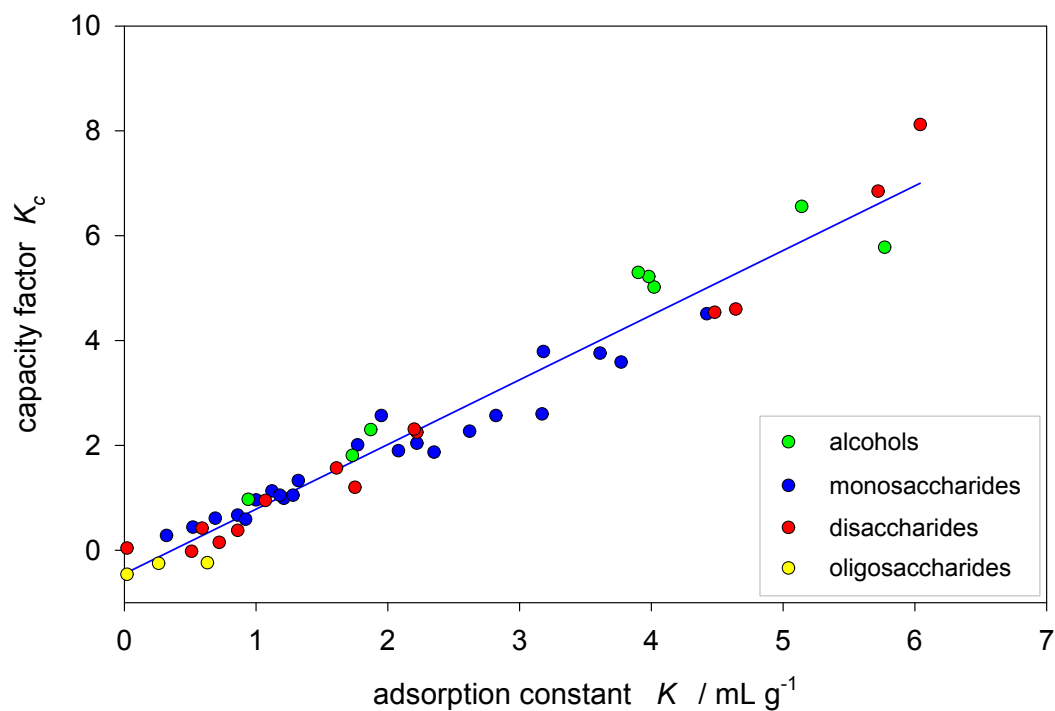

Figure A2: Correlation of the original capacity  $K_c$  factors as related to dextran and the absolute adsorption equilibrium constant  $K$ .

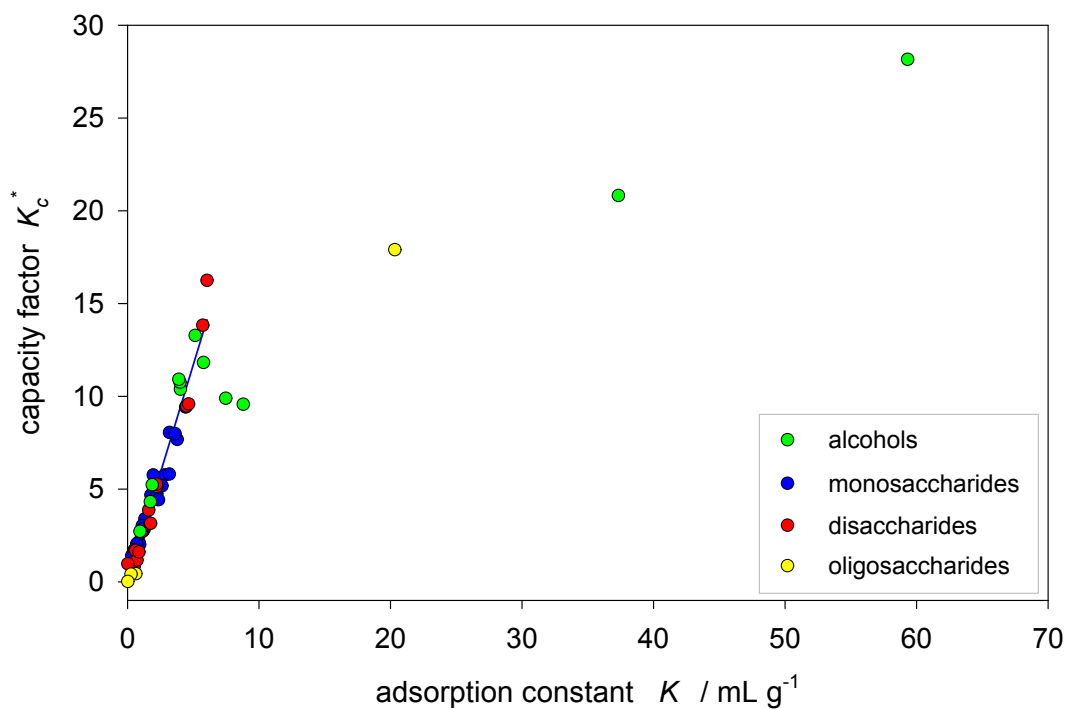

Figure A3: Full-range correlation of the HPLC capacity factors (corrected values)  $K_c^*$  and the absolute adsorption equilibrium constants  $K$  for the DAY zeolite.

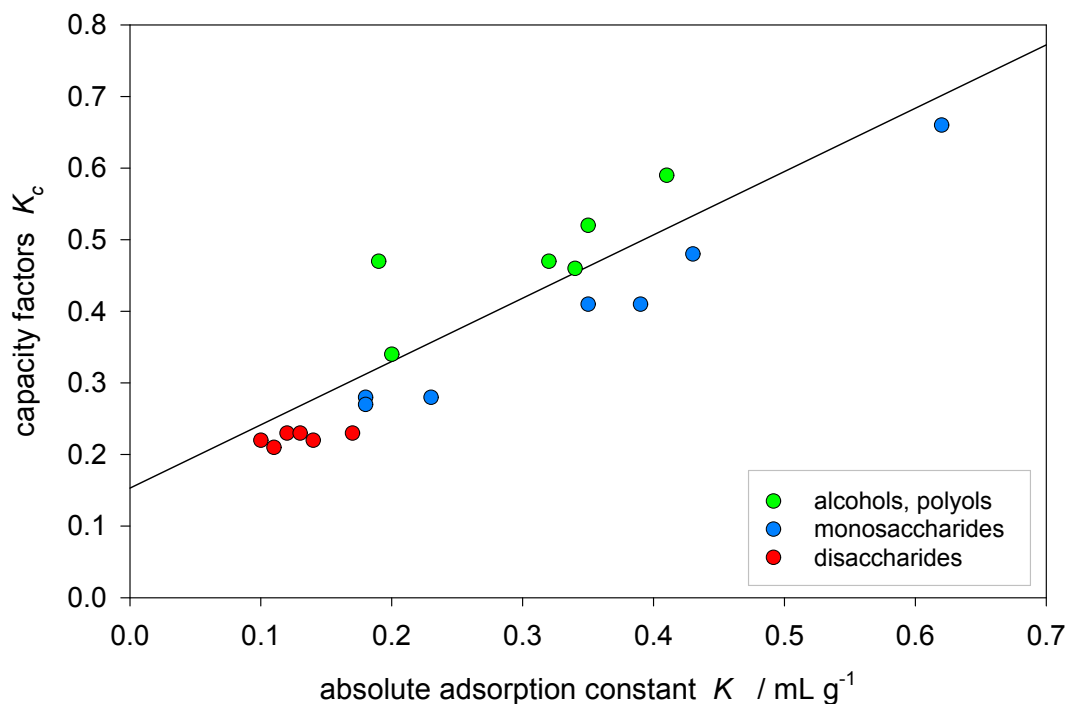

Figure A4: Correlation of the original capacity factors  $K_c$  and the absolute adsorption equilibrium constants  $K$  for the MOR type zeolite ( $\text{Si/Al} = 73.5$ )

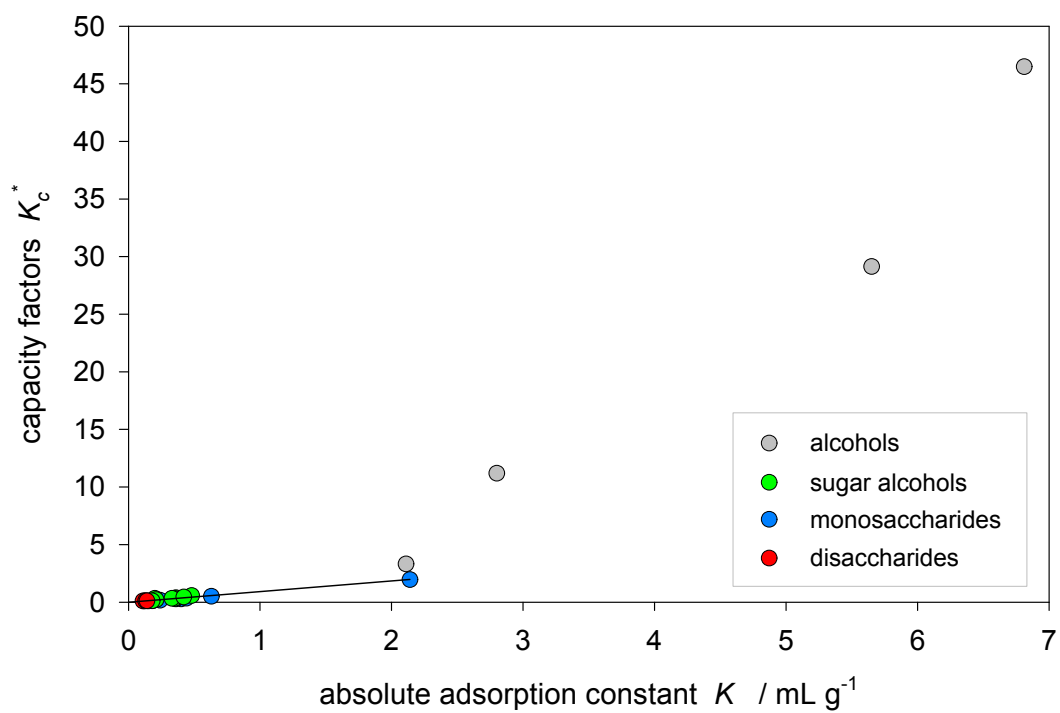

Figure A.5: Correlation between the corrected capacity factors  $K_c^*$  and the absolute adsorption equilibrium constants  $K$  for the MOR type zeolite (Si/Al = 73.5) - full data range.

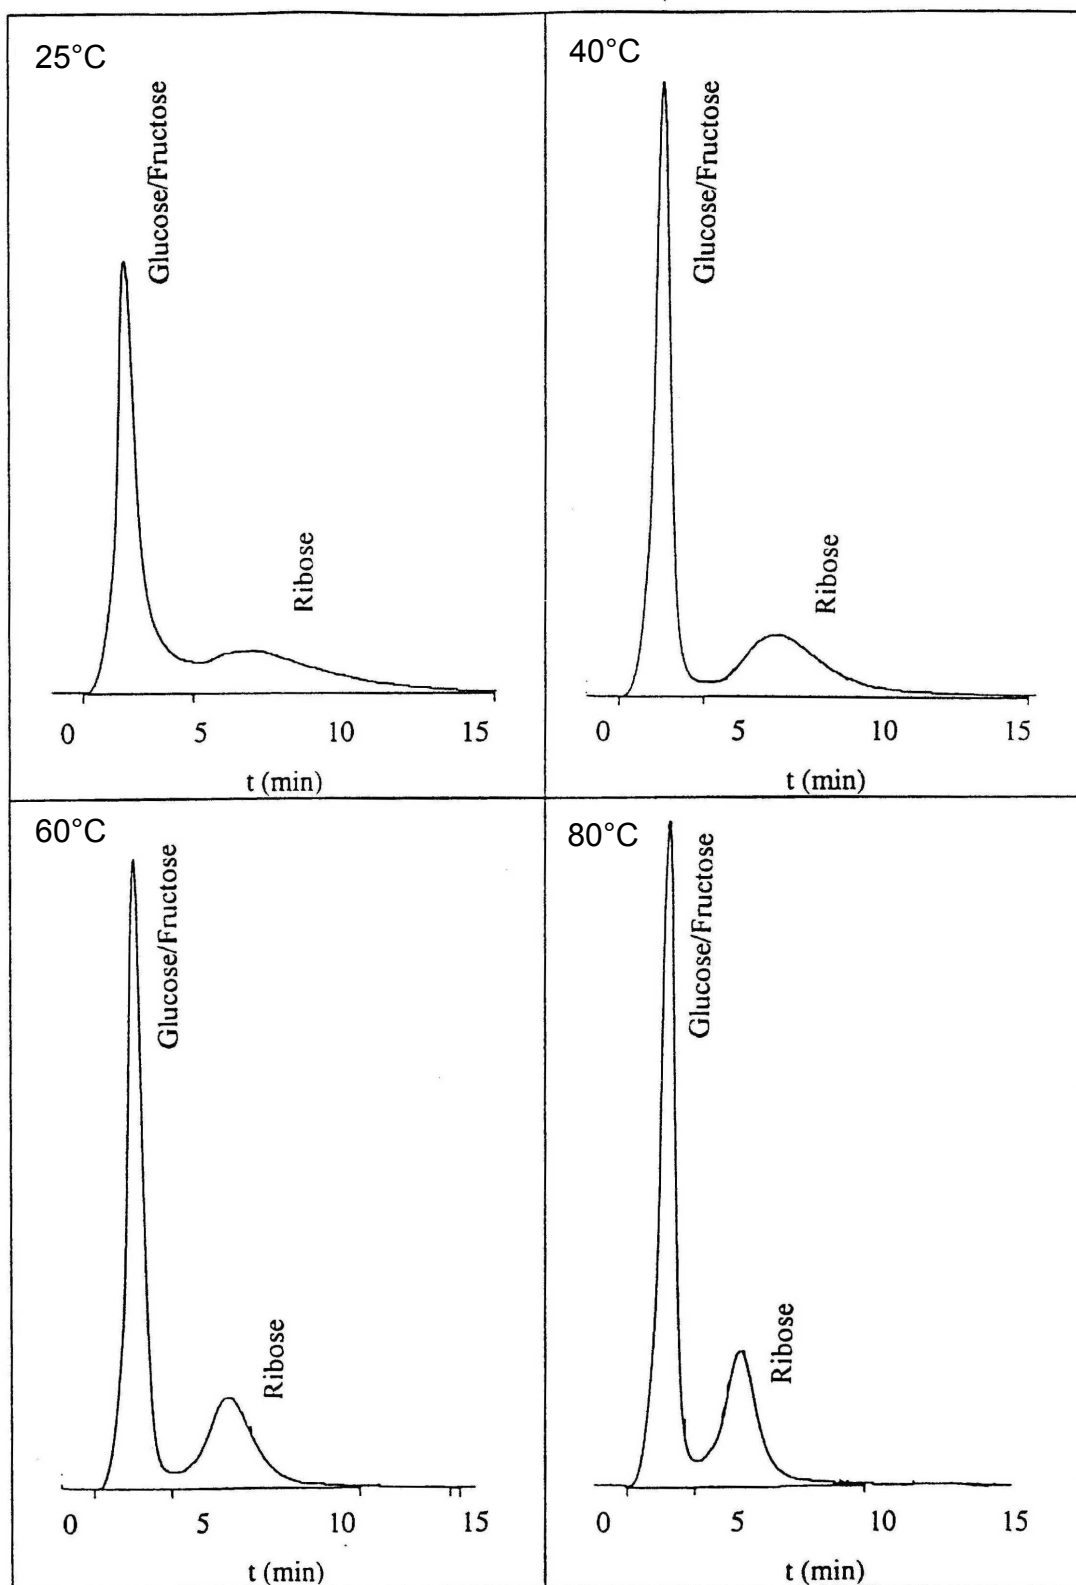

Figure A.6: HPLC of a solution of ribose, fructose, and glucose (each  $10 \text{ gL}^{-1}$ ) at different temperatures on the column filled with MOR zeolite ( $\text{Si/Al} = 73.5$ ),  $125 \times 4 \text{ mm}$ , flow  $0.5 \text{ mL min}^{-1}$ , injection  $20 \mu\text{L}$
